# Supplementary material for: Perfluorinated ionomer and poly(3,4-ethylenedioxythiophene) colloid as a hole transporting layer for optoelectronic devices
Source: Royal Society of Chemistry journal article supplement (doi:10.1039/d1ta04362e), 2021-01-01
Supplement: d1ta04362e1.pdf [file d1ta04362e1.pdf]

## Supplementary Information

### **Perfluorinated Ionomer and Poly(3,4-ethylenedioxythiophene) Colloid as a Hole Transporting Layer for Optoelectronic Devices**

Wei-Long Li,<sup>1</sup> Cheng-Hung Hou,<sup>\*2</sup> Chi-Ming Yang,<sup>1</sup> Kuen-Wei Tsai,<sup>1</sup> Jhao-Lin Wu,<sup>1</sup> Yu-Tang Hsiao,<sup>1</sup> Chintam Hanmandlu,<sup>2</sup> Chih-Wei Chu,<sup>2</sup> Chia-Hua Tsai,<sup>1</sup> Chuang-Yi Liao,<sup>1</sup> Jing-Jong Shyue,<sup>\*2</sup> Yi-Ming Chang<sup>\*1</sup>

<sup>1</sup>Raynergy Tek Incorporation, 2F, 60, Park Ave. 2, Hsinchu Science Park, Hsinchu 30844, Taiwan

E-mail: [ym.chang@raynergytek.com](mailto:ym.chang@raynergytek.com)

<sup>2</sup>Research Center for Applied Sciences, Academia Sinica, Taipei 11529, Taiwan

E-mail: [chhou@gate.sinica.edu.tw](mailto:chhou@gate.sinica.edu.tw), [shyue@gate.sinica.edu.tw](mailto:shyue@gate.sinica.edu.tw)

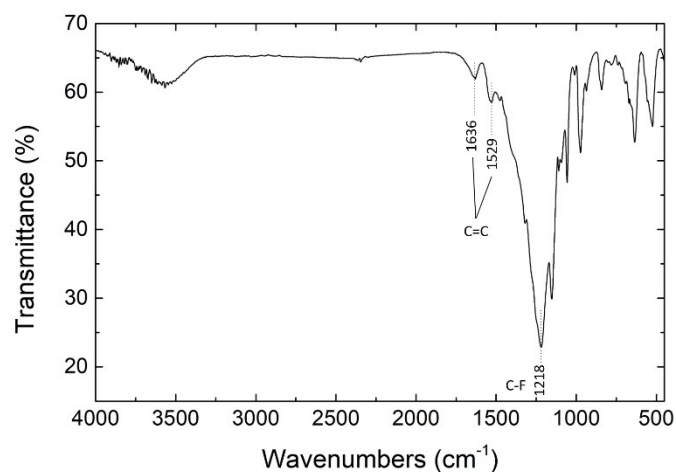

**Fig. S1.** FTIR spectrum of the PEDOT:PFI colloid. The spectrum was acquired from a compressed tablet made of CsI power and the PEDOT:PFI colloid solution. A spectrum of pure CsI tablet was measured first for the background signal subtraction.

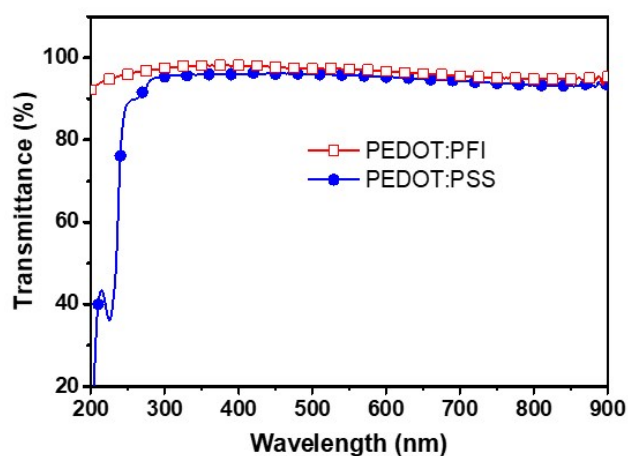

**Fig. S2.** UV-visible transmittance spectra obtained from PEDOT:PFI and PEDOT:PSS films. The films were prepared onto quartz substrates and deducted the reference signal during the measurement.

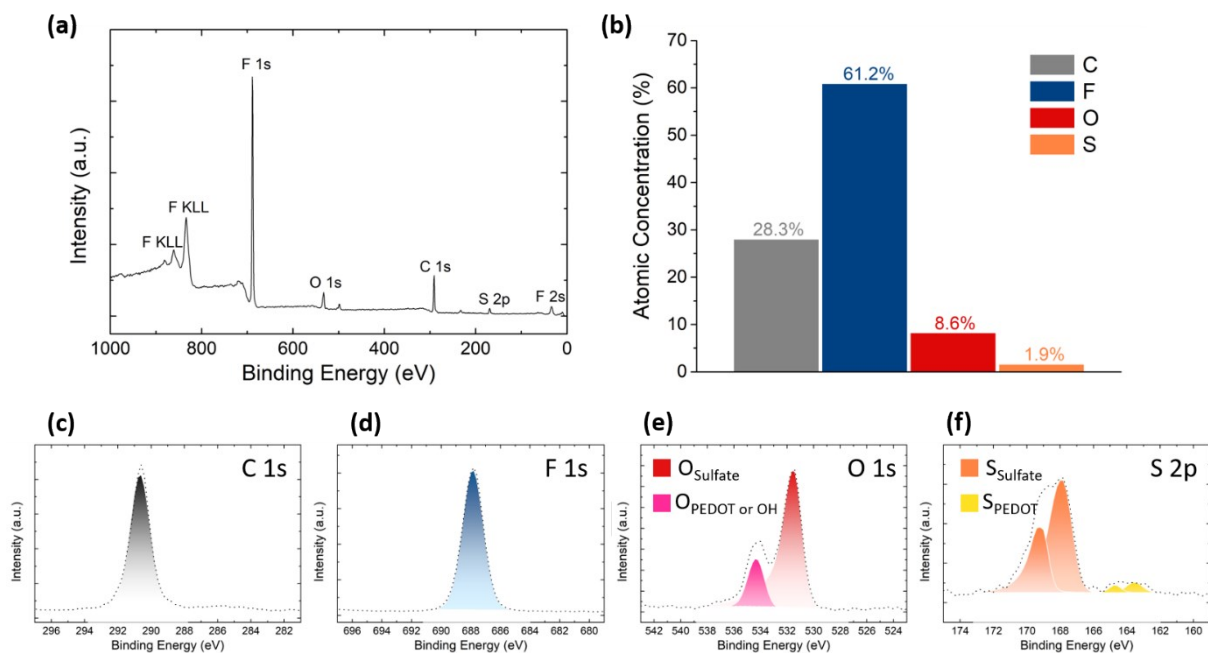

**Fig. S3.** XPS analysis results of the PEDOT:PFI (1:15) film deposited on a ITO substrate. (a) The survey XPS spectrum, (b) the surface element concentration of the PEDOT:PFI film, and the fine-scan (c) C 1s, (d) F 1s, (e) O 1s, (f) S 2p spectrum.

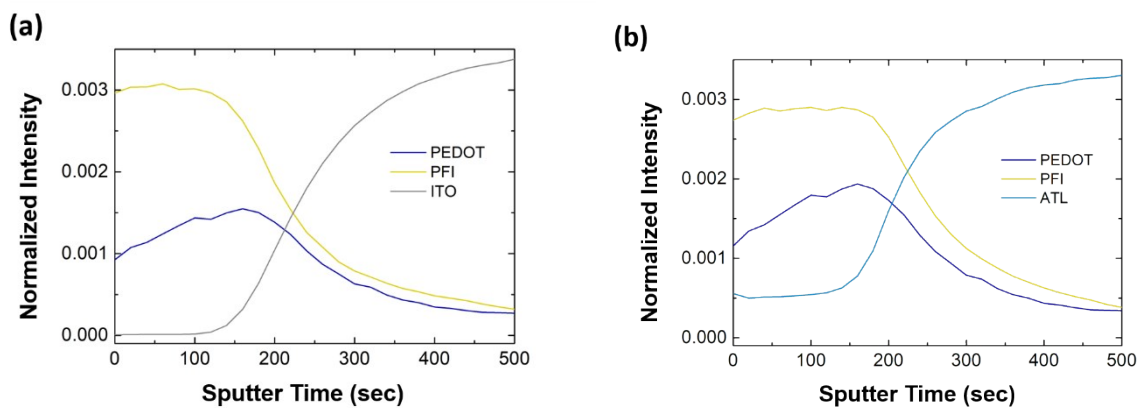

**Fig. S4.** ToF-SIMS depth profiles of the PEDOT:PFI film deposited on (a) ITO and (b) organic BJJ layer. A concentrated PEDOT component near the bottom interface could be identified in each profile.

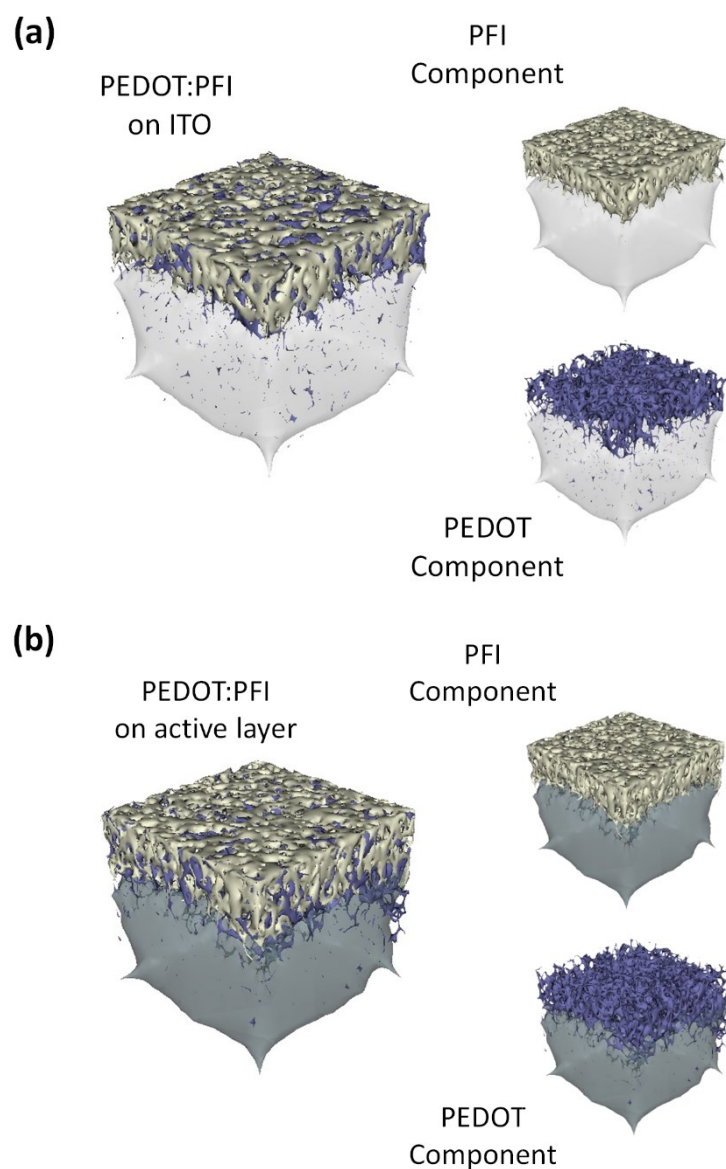

**Fig. S5.** ToF-SIMS 3D images of the PEDOT:PFI film deposited on (a) ITO and (b) organic BHJ layer. The analysis area was  $50 \mu\text{m} \times 50 \mu\text{m}$ . An interpenetrating PEDOT:PFI morphology was confirmed by the solely presented PEDOT and PFI 3D images, regardless of the substrate material.

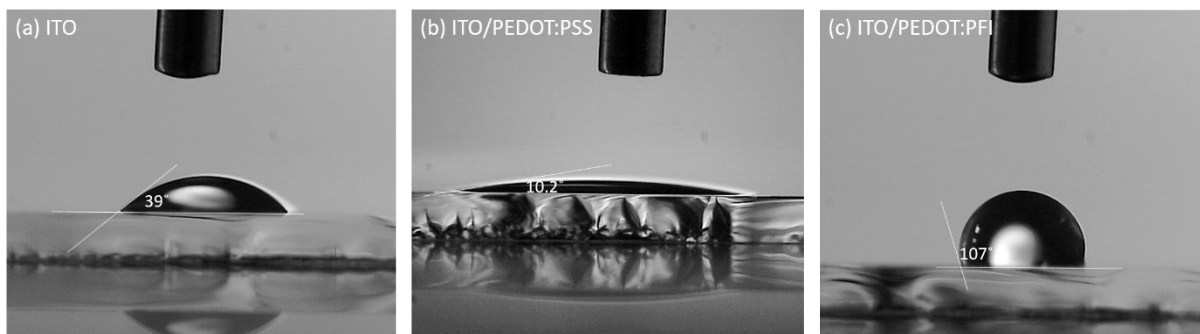

**Fig. S6.** Water contact angle images of (a) ITO, (b) PEDOT:PSS-coated ITO and (c) PEDOT:PFI (1:15)-coated ITO.

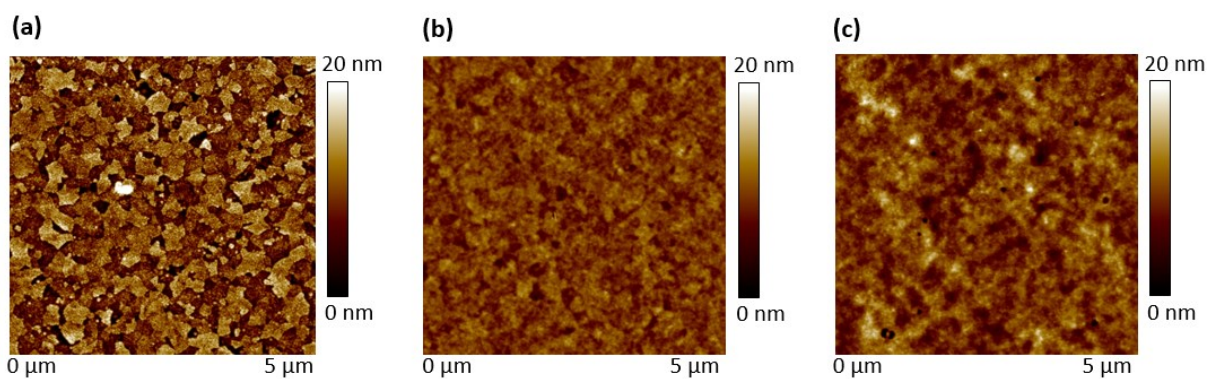

**Fig. S7.** The AFM images of (a) ITO, (b) PEDOT:PSS-coated ITO, and (c) PEDOT:PFI (1:15)-coated ITO.

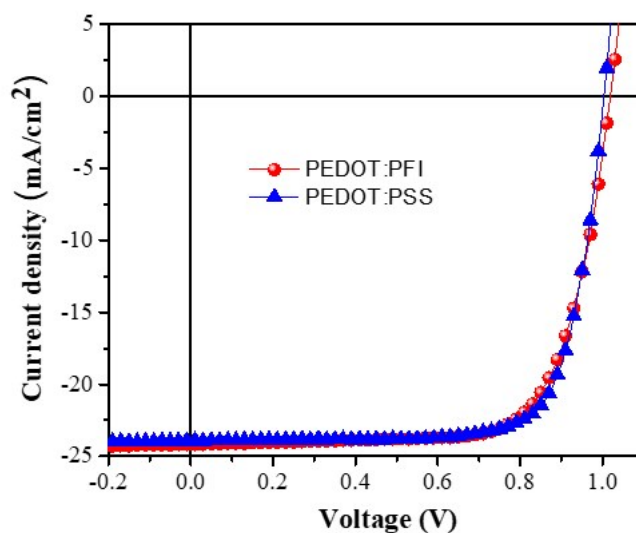

**Fig. S8** J-V characteristics of the PSCs utilizing the PEDOT:PSS (blue circles) and the PEDOT:PFI (1:15) (red triangles) as the HTL.

**Table S1.** Summary of the on-set and cut-off positions determined by the UPS spectra and the corresponding HOMO and work function values of the investigated materials.

|                  | On-Set (eV) <sup>†</sup> | Cut-Off (eV) | HOMO (eV) | Work function (eV) |
|------------------|--------------------------|--------------|-----------|--------------------|
| Ag               | 0                        | 16.9         | -         | 4.3                |
| PEDOT:PSS        | 0.08                     | 15.64        | -5.64     | 5.56               |
| PEDOT:PFI (1:15) | 0.74                     | 15.99        | -5.95     | 5.21               |
| PEDOT:PFI (1:30) | 1.08                     | 16.29        | -5.99     | 4.91               |
| PV2001           | 0.46                     | 17.29        | -4.37     | 3.91               |
| PV-D4610         | 0.25                     | 17.15        | -4.3      | 4.05               |
| PV2300           | 0.74                     | 17.31        | -4.64     | 3.9                |
| PD2001           | 0.49                     | 17.43        | -4.25     | 3.76               |
| Au               | 0                        | 16.01        | -         | 5.19               |
| AZO              | 0.89                     | 17.06        | -5.03     | 4.14               |
| ND1000           | 1.18                     | 16.01        | -6.37     | 5.19               |
| PD-A2            | 0.56                     | 17.08        | -4.68     | 4.12               |

<sup>†</sup>By definition, the magnitude of HOMO off set is equal to the on-set value.
